# Supplementary material for: Targeted Next-Generation Sequencing Analysis of BALF Microbiota and Clinical Characteristics in Severe versus Non-Severe Community-Acquired Pneumonia
Source: Research Square preprint supplement (doi:10.21203/rs.3.rs-8342132/v1), 2026-01-22
Supplement: Supplementary file 1 [file c110498dd3955d4c3c1eeaed.xlsx]

## Sheet: merged_data_complete
姓名	住院天数	分组	性别	年龄	身高	体重	吸烟史	饮酒史	高血压	脑梗	冠心病	肺部疾病	糖尿病	白细胞	中性粒细胞计数	中性粒细胞比例	淋巴细胞比例	PCT	CRP	D-二聚体	IL-6	ESR	nan	大肠埃希菌	微小微单胞菌	单纯疱疹病毒1型(HSV-1)	热带念珠菌	白念珠菌	肺炎克雷伯菌	耶氏肺孢子菌	人类疱疹病毒7型(HHV-7)	巨细胞病毒(CMV)	具核梭杆菌	EB病毒(EBV)	人呼吸道病毒3型（人副流感病毒3型）	咽峡炎链球菌群	惠普尔养障体	流感嗜血杆菌	甲型流感病毒H3N2	肺炎支原体	人冠状病毒OC43	金黄色葡萄球菌	光滑念珠菌	鲍曼不动杆菌	耐甲氧西林葡萄球菌耐药基因	结核分枝杆菌复合群	铜绿假单胞菌	按蚊伊丽莎白金菌	人腺病毒C组
白学敏	13	重症	男	57	170	75	否	否	否	否	否	否	否	4.1	3.36	81.9	13.7	0.44	176.43	1.28	258.9	107	45	0	0	0	0	23354	0	0	0	0	0	0	0	0	0	0	0	0	0	0	2542	0	0	0	380	0	0
程冠旗	15	重症	男	46	175	65	否	否	否	否	否	是	否	8.72	6.43	73.7	18.6	0.06	26.04	0.37	169.5	48	46	0	0	0	0	1510	0	1082	0	0	595	30	0	0	0	0	0	0	0	0	0	0	0	0	0	0	0
原省芳	6	重症	女	65	160	66	否	否	否	否	否	否	否	7.12	5.76	80.9	12.4	5	289.13	2.64	73.8	106	47	0	0	13	0	31794	0	0	0	0	0	0	0	0	0	0	12213	0	0	0	0	0	0	0	0	0	0
李福祥	8	重症	男	76	170	70	是	是	是	否	是	否	否	12.34	11.68	94.6	2.3	2.46	82.67	32.04	335.6	82	48	0	0	0	0	24372	0	6159	0	342	0	854	0	0	0	0	0	0	0	0	0	0	0	0	0	0	0
叶宗元	5	重症	男	87	156	54	是	否	否	否	否	否	否	14.97	12.84	85.7	5.3	0.99	68.29	15.89	159	103	49	0	0	0	0	5958	0	0	0	16	0	0	0	0	0	0	0	0	0	0	85	0	0	0	0	0	0
杨宗	15	重症	男	60	180	100	否	否	否	否	否	否	否	12.79	11.34	88.6	6.2	0.13	71.41	0.22	71.59	115	50	0	0	0	0	0	0	0	2	0	0	0	0	0	0	0	0	0	0	0	0	0	0	0	0	0	0
陈国胜	8	重症	男	68	170	65	是	否	否	否	否	是	否	16.31	14.86	91.1	4	0.05	22.05	133.99	305	24	51	0	0	0	0	0	61	0	0	0	0	0	0	0	0	932	0	0	0	0	0	0	0	37	0	0	0
薛占创	3	重症	男	58	170	82	否	否	否	否	否	否	否	8.34	5.23	62.6	26.5	0.03	1.34	0.28	206.9	7	52	0	0	0	0	38	0	0	0	0	0	0	0	0	0	95	0	0	0	0	0	0	0	36	0	0	0
柴自来	9	重症	男	77	166	65	是	是	否	否	否	否	否	14.21	13.71	96.5	2.4	37.97	281.15	1.63	238.5	38	53	0	0	0	318	90	0	0	0	0	0	0	0	0	0	0	0	0	0	0	0	0	0	0	0	0	0
景浮鱼	5	重症	男	82	170	80	是	否	否	是	否	是	否	36.59	34.72	94.9	0.8	4.89	283.2	0.91	23.83	93	54	0	0	0	0	6046	0	0	0	0	62	0	0	0	0	26625	0	0	0	0	0	0	0	0	0	0	0
张启栓	28	重症	男	62	170	卧床	否	否	是	否	否	否	是	12.54	10.75	85.7	9	0.11	57.7	0.23	123	120	55	0	0	392	0	0	491	0	0	0	0	0	0	0	0	0	0	0	0	0	0	0	0	0	5775	0	0
李梦录	10	重症	男	82	170	69.5	是	是	否	是	否	是	否	6.08	4.22	69.4	20.9	0.1	57.38	4.63	211.3	59	56	0	0	0	0	11248	0	0	0	14	0	97	0	0	0	0	0	16	0	0	0	0	0	0	0	0	0
许丙立	12	重症	男	70	177	60	是	否	否	否	是	否	否	18.5	16.69	90.2	3.5	0.1	111.64	2.42	109	67	57	22	0	106	0	0	0	12	0	0	0	0	0	0	0	0	0	0	0	0	0	0	0	0	0	26	0
任明军	12	重症	男	46	175	59	否	否	否	否	否	是	否	14.23	11.76	82.7	6.8	1.15	292.77	1.5	208	78	58	0	4571	0	0	0	0	0	0	0	46	0	0	3444	0	0	0	0	0	0	0	0	0	0	1214	0	0
赵玉梁	13	重症	男	61	175	96	是	是	是	否	否	否	是	11.87	9.96	83.9	14.5	0.09	27.99	2.35	78.77	55	59	0	0	0	0	0	0	20416	0	3835	0	0	0	0	0	0	0	0	0	0	0	0	0	0	0	0	0
王芳	16	重症	女	51	158	57.5	否	否	否	否	否	否	否	10.55	9.33	88.4	5.8	3.73	208.88	2.35	2518	72	60	0	0	0	0	0	113	0	0	0	0	0	0	0	0	78	0	0	0	30530	0	0	0	0	0	0	0
荆东立	13	重症	男	61	170	80	否	否	否	否	是	否	否	12.45	9.82	78.9	10.9	0.12	80.13	3.49	100.9	66	61	0	0	54	0	0	0	0	0	0	0	0	0	0	0	0	0	0	0	2318	0	0	0	0	0	0	0
赵根芳	10	重症	男	77	170	65	是	是	是	否	否	否	否	6.27	4.27	68.1	18.3	0.25	100.91	1.48	43.34	91	62	0	0	0	0	0	0	0	11	0	0	41	0	0	0	0	0	0	0	0	0	0	0	0	0	0	0
樊麦生	6	重症	男	75	卧床	卧床	是	否	是	否	否	否	否	2.16	1.73	80.1	17.6	0.82	69.44	0.91	245.1	84	63	0	0	7	0	575	0	0	0	0	0	0	0	0	0	0	0	0	0	0	0	0	0	0	0	0	0
刘家锁	16	非重症	男	63	171	60	是	否	否	是	否	否	是	14.6	13.22	93.8	3.5	5.43	212.47	1.72	60.47	23	64	2009	377	2259	863	2779	57239	0	0	19	0	19	0	0	0	0	0	0	0	0	0	0	0	0	0	0	0
乔玉英	9	非重症	女	81	164	75	否	否	否	是	否	否	否	12.35	9.54	77.3	15	0.25	140.08	1.53	236.9	89	65	0	0	0	0	0	0	0	0	0	1425	9	1839	169	28	14993	12923	41	6414	167	22	0	0	0	0	0	0
肖自立	10	非重症	男	85	卧床	卧床	否	否	是	是	否	否	否	9.23	8.1	87.8	6.5	0.11	38.1	3.51	71.23	110	66	11931	0	3	0	603	0	0	0	0	0	0	0	0	0	0	0	0	0	149	0	51232	12	5778	571	0	0
李时雨	5	非重症	女	32	164	53	否	否	否	否	否	否	否	5.62	3.97	70.7	20.8	0.02	1.12	0.15	8.76	31	67	0	0	0	0	0	0	0	0	0	0	0	0	0	0	0	0	3124	0	30971	0	0	0	0	0	0	0
邵春芳	7	非重症	女	67	154.5	45.5	否	否	否	否	否	否	否	19.8	18.29	92.3	2.4	0.75	68.07	0.77	12.82	78	68	24	0	0	0	3810	0	0	0	0	0	0	0	0	0	0	0	0	0	0	0	0	0	0	0	0	0
马根良	14	非重症	男	58	162	45	是	是	是	是	否	否	否	12.98	3.45	91.9	18.8	0.38	65.42	1.07	7.96	23	69	0	0	0	0	357	0	0	0	0	0	0	0	0	0	0	0	0	0	0	0	0	0	0	0	0	0
卫全创	7	非重症	男	77	155.5	47	是	否	否	是	否	否	否	6.95	4.88	70.3	17	0.09	64.57	0.39	9.29	18	70	0	0	0	0	28210	61	0	0	0	0	0	0	0	0	0	0	0	0	0	0	0	0	0	0	0	0
王群合	27	非重症	男	62	160	53	是	否	否	否	否	否	否	23.79	20.78	87.3	6.7	0.35	75.95	1.56	529.9	15	71	0	0	0	0	0	0	0	0	25	0	45	0	0	0	0	0	0	0	0	0	0	0	0	25647	0	0
刘建龙	16	非重症	男	64	174	81.3	是	否	否	是	否	否	否	10.91	9.42	86.3	4.4	0.12	58.65	0.95	30.56	108	72	0	1770	0	0	4255	0	0	0	329	204	46	0	542	0	0	0	0	0	0	0	0	0	0	0	0	0
王青宪	31	非重症	男	70	168	75	是	否	否	是	否	否	否	7.29	5.96	81.8	14.5	0.16	140.01	1.94	609	14	73	0	0	86	0	0	0	0	0	54	0	45	0	0	0	0	0	0	0	0	0	47778	0	0	0	0	0
王长印	17	非重症	男	76	174	57	是	是	否	否	否	否	否	12.01	10.19	84.8	6.8	0.21	81.71	0.61	83.2	11	74	0	96	6	8716	13746	0	0	0	7	0	67	0	0	0	0	0	0	0	0	0	0	0	0	7757	0	0
王中孝	10	非重症	男	78	162	50.5	是	否	是	是	否	否	否	6.14	3.92	63.9	29.6	0.12	124.86	0.81	41.95	13	75	0	73	7	0	0	0	0	0	132	0	6	0	352	10	5179	0	0	0	0	0	0	0	0	0	0	0
田秀花	12	非重症	女	76	162	69	否	否	是	否	否	否	否	7.36	6.95	94.4	3.8	0.02	11.61	0.35	1.75	33	76	0	0	4125	0	12401	0	0	5	15	137	545	0	0	0	0	1703	0	0	0	1819	0	0	0	0	0	0
王东厚	4	非重症	男	61	166	52	是	否	否	否	否	否	否	3.69	1.15	31.1	22.8	0.05	0.98	1.02	18.73	35	77	0	137	0	0	8682	729	0	0	0	523	0	0	0	0	756	0	0	0	0	0	0	0	0	0	0	0
燕新喜	10	非重症	男	72	166.5	61.5	是	否	否	否	否	否	否	19.74	18.53	93.9	1.9	1.53	300.52	1.46	123.1	86	78	0	0	34	0	18275	0	0	0	0	0	7227	0	0	0	0	0	0	0	0	0	0	0	0	0	0	0
郭克功	5	非重症	男	76	165	52.5	是	否	是	是	否	否	否	6.63	0.88	78.4	13.3	0.09	39.89	0.98	17.5	23	79	25232	0	704	10671	0	310	0	0	0	0	234	0	0	0	0	0	0	0	0	0	0	0	0	0	0	0
王绍太	37	非重症	男	91	156	55	是	否	是	是	是	否	否	6.97	5.68	81.6	7.6	0.11	75.14	0.52	54.82	14	80	0	0	0	0	15545	494	0	0	0	0	135	0	0	0	0	0	0	0	0	0	47459	0	0	0	0	0
张德民	7	非重症	男	65	165	45	是	否	是	是	否	否	否	9.93	7.42	74.8	20.6	3.13	73.49	0.94	9.43	18	81	1838	0	1183	13679	0	0	0	0	61	0	665	0	416	0	0	0	0	0	0	0	0	0	0	2165	0	0
张灶喜	11	非重症	男	75	167	60	是	是	是	否	否	否	否	7.52	5.17	68.8	20.7	0.03	54.55	0.65	34.32	8	82	0	0	0	0	0	0	0	0	0	0	0	0	0	0	0	0	0	0	5529	0	0	3245	0	0	0	0
任跃州	3	非重症	男	49	165.5	71	否	否	否	否	否	否	否	8.55	6.23	72.9	18.9	0.08	0.43	0.54	3.61	16	83	0	230	0	0	0	0	327	0	170	514	295	0	441	0	0	0	0	0	0	0	0	0	0	0	0	0
任保才	13	非重症	男	75	163.5	66	是	否	否	否	否	否	否	10.04	8.7	86.6	4.5	0.24	160.3	1.92	247.4	85	84	0	0	0	0	1899	32861	0	0	0	1452	0	0	0	0	0	0	0	0	6426	0	0	0	0	0	0	0
史红太	16	非重症	男	66	172	50	是	否	是	是	是	否	是	12.11	10.47	86.4	9.9	2.21	124.32	2.13	13.58	11	85	0	0	0	0	57245	0	42	0	39	0	1674	0	0	0	0	0	0	0	0	0	752	0	0	0	0	0
孙钦光	12	非重症	男	77	170	45	否	否	否	否	是	是	否	12.99	11.92	91.7	3.8	0.35	168.64	0.79	823.9	110	86	0	0	19	0	11790	0	0	0	0	0	2654	0	39	0	0	0	0	0	0	0	0	0	0	0	0	0
薛稳全	3	非重症	男	71	162	44.5	是	是	否	否	否	否	否	8.22	4.96	60.2	31.8	0.07	77.15	0.83	15.55	88	87	18583	381	0	0	13377	0	0	0	6	0	2014	0	0	0	0	0	0	0	0	0	0	0	0	0	0	0
曹站兵	9	非重症	男	49	175	80	是	是	否	否	否	否	否	4.81	2.9	60.3	31.2	0.12	0.43	0.62	17.86	9	88	0	1084	0	0	0	34301	0	0	189	0	0	0	0	0	0	0	0	0	0	0	0	0	0	219	0	0
唐秋霞	5	非重症	女	57	156	47	否	否	否	否	否	否	否	5.03	2.78	55.3	35.2	0.02	0.28	0.23	16.33	15	89	0	715	0	0	21741	0	0	0	0	3040	0	0	3009	0	0	0	0	0	23	0	0	0	0	0	0	0
董运浩	6	非重症	男	55	171.5	69	是	是	否	否	否	否	否	8.16	5.34	65.4	28.9	0.16	128.99	0.2	36.3	93	90	0	0	0	0	32973	0	0	0	0	0	0	0	0	212	44342	0	0	0	0	0	0	0	0	0	0	0
曹婵女	8	非重症	女	81	154.5	54	否	否	否	是	否	否	否	6.69	3.65	54.6	36.2	0.03	8.17	0.49	4.78	23	91	0	213	0	0	0	7428	0	0	0	349	0	0	1909	0	121	0	0	0	0	0	0	0	0	0	0	0
胡航川	6	非重症	男	15	164	57	否	否	否	否	否	否	否	5.38	3.55	66	24.9	0.07	50.2	0.42	6.22	44	92	0	0	0	0	0	0	0	0	0	164	0	0	221	0	0	0	15313	0	30	0	0	31	0	0	0	0
赵世民	4	非重症	男	65	175	79	是	否	是	否	否	否	是	5.31	4.31	81.1	10.4	0.19	22.57	0.71	9.24	121	93	560	0	0	0	0	0	878	9	0	49	0	0	0	0	0	0	0	0	0	0	0	0	0	0	7	0
薛稳	7	非重症	男	45	171	50	是	是	否	否	否	否	否	8.59	6.92	80.5	11.8	0.03	16.92	0.39	10.15	62	94	0	40	0	0	466	0	0	0	0	807	0	0	1362	0	0	0	0	0	0	0	0	0	0	0	4	0
张云庆	14	非重症	男	73	168	65.5	是	否	否	否	否	否	否	10.41	7.73	74.2	14.6	1.35	126.17	1.2	116.1	132	95	0	0	0	0	16197	0	15	0	32	146	186	0	0	0	0	0	0	0	0	0	0	0	0	0	0	0
牛欢虎	6	非重症	男	57	168.5	56.5	否	否	否	否	否	否	否	12.84	9.45	73.6	16.1	0.14	44.18	7.57	73.13	86	96	0	0	0	0	10226	0	0	0	0	0	1031	0	0	0	0	0	0	0	0	0	0	0	0	0	0	0
张青玲	5	非重症	女	72	149	49.5	否	否	否	否	否	否	否	7.21	4.49	62.3	28.4	0.04	2.22	0.29	7.92	13	97	0	30	0	0	7882	0	0	0	0	0	0	0	255	0	0	0	0	0	0	0	0	0	0	6975	0	0
郝典增	8	非重症	男	73	165	46	是	是	否	否	否	否	否	3.57	2.79	78.2	12.6	1.01	149.52	1.58	48.7	21	98	81	0	2245	0	30135	0	0	0	0	0	3698	0	0	0	0	0	0	0	0	0	0	0	0	10910	0	0
杨建波	8	非重症	男	43	39	181	否	否	是	否	否	否	否	5.82	4.37	77.9	12.8	0.08	76.47	0.26	131	46	99	0	0	0	0	0	2903	0	0	0	786	0	0	0	2885	0	0	0	0	2826	0	0	37	0	0	0	0
刘保成	10	非重症	男	83	167	61.5	否	否	是	否	否	否	否	8.3	6.75	81.4	9.6	0.08	60.31	0.35	106.9	83	100	0	0	0	0	20671	580	0	0	0	2284	429	0	1014	0	0	0	0	0	0	0	0	0	0	0	0	0
王碧涛	10	非重症	男	36	卧床	卧床	是	是	否	否	否	否	否	5.46	3.24	59.3	35.9	1.77	93.92	1.46	1522	21	101	0	0	0	0	626	0	0	0	0	18	0	0	24	0	0	0	0	0	0	0	0	0	0	0	0	0
王玲玲	7	非重症	女	75	156	65	否	否	否	是	否	否	是	11.92	8.5	71.4	19.1	0.07	32.83	0.31	7.34	76	102	0	0	0	0	26607	297	215	0	0	887	4	0	0	0	0	0	0	0	0	0	0	0	0	0	0	0
李翠萍	2	非重症	女	61	157	60	否	否	否	否	否	否	否	5.26	2.6	49.4	38.4	0.32	53.29	0.82	16.17	35	103	0	0	0	0	291	27	0	0	0	0	0	0	0	118	0	0	21363	0	0	0	0	0	0	0	0	0
杨水平	7	非重症	男	72	167	60.5	否	否	否	否	否	否	否	5.15	3.98	77.2	10.7	0.06	75.01	1.4	77.3	120	104	0	0	0	0	21312	0	0	0	0	0	1640	58	0	0	0	0	0	0	616	219	0	0	0	0	0	0
李雨坤	13	非重症	男	18	174	80.5	否	否	否	否	否	否	否	5.49	4.41	80.3	13.7	0.37	117.06	1.81	19.06	67	105	0	0	15	0	1497	0	0	0	0	0	0	0	0	0	0	0	33858	0	0	0	0	0	0	0	0	0
苏创业	13	非重症	男	70	166	53	否	否	是	否	否	否	否	9.94	8.45	85.1	6.8	0.39	109.59	1.61	84.75	46	106	0	32	42	0	0	0	0	0	24	0	62	0	0	0	0	0	0	0	0	0	0	0	0	0	0	0
荆宝霞	6	非重症	女	77	157	71	否	否	是	否	否	否	否	7.59	4.99	65.7	24.4	0.06	62.13	0.5	38.77	29	107	0	88	0	0	0	1721	0	0	25	61	0	0	0	0	0	0	0	0	0	0	0	0	0	57	0	0
胡慢慢	6	非重症	女	40	159	49	否	否	否	否	否	否	否	3.47	2.51	72.3	22.8	0.09	62.86	4.03	128.5	92	108	0	0	700	0	3091	0	0	0	0	570	6260	0	0	0	0	0	0	0	0	0	0	0	0	0	0	0
陈文龙	6	非重症	男	66	165	95	是	否	是	是	否	否	否	10.35	8.34	80.6	13.4	0.08	78.24	1.15	54.43	97	109	0	2968	0	0	0	0	0	0	0	0	0	0	1443	0	0	0	0	0	1224	0	0	124	0	422	0	0
刘明庚	12	非重症	男	61	160	60	否	否	否	否	否	否	否	5.29	3.66	69.1	19.1	0.02	26.54	11.92	56.45	22	110	0	0	0	23561	221	0	170	0	0	0	0	0	0	0	0	0	0	0	0	152	0	0	0	0	52	0
赵全民	15	非重症	男	71	172	72	是	否	否	否	否	否	否	7.8	6.79	87.1	10	0.34	184.77	6.75	107	28	111	236	0	0	0	2424	0	0	0	0	0	0	0	0	0	0	0	0	0	0	105	0	0	0	0	0	0
张廷民	9	非重症	男	56	158	47	否	否	是	否	否	否	否	14.02	11.43	81.6	9.8	0.28	151.68	1.63	116.4	107	112	0	0	0	0	0	45	0	0	0	0	63	0	0	0	0	0	0	0	0	0	0	0	0	0	0	0
张建华	5	非重症	男	57	167	65	是	是	否	否	否	否	否	25.73	24.15	93.8	2.3	1.12	55.72	3.08	12.82	36	113	0	0	0	0	0	0	0	0	0	0	0	0	0	0	423	0	0	0	276	0	0	0	0	0	0	0
卫炎枝	4	非重症	女	73	151	59.5	否	否	是	否	否	否	否	5.67	4.04	71.3	21.3	0.04	6.76	0.4	4.96	22	114	0	0	0	0	363	0	0	0	0	0	12	0	484	0	0	0	0	0	0	0	0	0	0	0	0	0
张青峰	6	非重症	男	52	170.5	69	是	否	否	否	否	否	否	11.2	8.26	73.7	18.4	0.07	48.97	0.15	25.65	45	115	0	161	0	0	0	0	16	0	0	0	30	0	181	0	0	0	0	0	0	0	0	0	0	0	0	0
朱桃梅	7	非重症	女	60	152	52	否	否	是	否	否	否	否	5.76	2.7	46.9	40.6	0.03	7.64	0.42	3.65	43	116	0	0	0	0	7115	0	0	0	0	3809	0	0	750	0	21	0	0	0	0	0	0	0	0	0	0	0
贾增学	8	非重症	男	59	180	84.5	否	否	是	否	否	否	否	9.88	7.32	74.1	17.8	0.17	105.33	1.6	33.61	102	117	0	209	0	0	0	0	0	0	38	0	50	0	0	0	0	0	0	0	0	0	0	0	0	0	0	0
王平顺	10	非重症	男	80	160	54	是	是	否	否	否	否	否	6.42	4.48	69.7	17.6	0.02	17.25	4.18	18.5	33	118	0	0	0	0	25962	0	0	0	0	0	431	0	0	0	0	0	0	0	0	0	0	0	0	0	0	0
丁金海	11	非重症	男	76	170	48.5	是	否	否	是	否	否	否	12.39	9.69	78.3	12	0.11	75	0.7	92.57	15	119	0	0	0	0	21040	0	54	0	0	0	26	0	0	0	0	0	0	0	0	2857	0	0	0	0	0	0
丁七林	6	非重症	男	63	166	51	是	否	否	否	否	否	否	4.51	2.09	46.3	27.3	0.04	60.23	0.93	38.6	118	120	0	0	0	0	0	698	0	0	100	0	220	0	0	0	0	0	0	0	0	0	0	0	0	64	0	0
刘八一	5	非重症	男	61	165	54.5	是	否	否	否	否	否	否	7.47	4.85	64.9	23	0.02	0.36	0.18	3.25	8	121	0	0	0	19169	0	13822	0	0	0	604	0	0	1133	0	0	0	0	0	0	0	0	0	0	6387	0	0
王连连	4	非重症	女	65	158	67.5	是	是	否	否	否	是	否	9.64	6.03	62.5	27.6	0.04	1.33	0.35	7.35	60	122	0	0	0	0	3452	0	0	0	0	0	0	0	0	0	0	0	0	0	0	0	0	0	0	204	0	0
李伟龙	10	非重症	男	54	160.5	59	否	否	否	否	是	否	否	8.67	6.87	79.3	8.8	0.18	149.18	1.92	19.1	76	123	0	0	0	0	0	0	0	0	0	0	0	0	0	0	0	0	0	0	0	0	124	0	0	0	11	0
马荣考	8	非重症	男	73	163	79.5	否	否	是	是	是	否	否	8.75	7.07	80.9	9.9	0.13	83.36	1.09	40.67	35	124	0	1308	4	0	0	0	484	4	0	0	883	0	0	0	0	0	0	0	0	0	0	0	0	0	0	0
谢自强	7	非重症	男	81	164	74	是	否	是	否	否	否	否	6.9	5.17	75	14.3	0.05	56.43	4.2	17.26	21	125	0	0	0	0	0	0	0	0	4	0	47	0	0	0	0	0	0	0	0	0	0	0	0	0	0	0
邵稳定	4	非重症	男	76	183	85	是	是	是	是	否	否	是	13.27	11.61	87.4	5	2.02	28.69	0.67	288	10	126	0	0	0	0	89	12937	0	0	0	113	0	0	0	0	31367	0	0	0	0	0	0	0	0	0	0	0
吕文胜	6	非重症	男	54	178.5	68	是	是	否	否	否	否	否	8.72	6.21	71.3	22.2	0.07	6.91	0.43	7.66	24	127	0	0	0	0	0	0	0	0	0	1253	0	0	153	0	72	0	0	0	0	0	0	0	0	0	0	0
赵蕊娟	8	非重症	女	65	161	63	否	否	是	否	是	否	否	4.88	3.23	66.2	27.7	0.03	0.21	0.11	1.5	11	128	0	0	0	0	0	0	0	0	0	2235	21	0	0	0	0	0	0	0	0	0	0	0	0	0	4	0
费永荣	4	非重症	男	39	177	87.5	否	否	否	否	否	否	否	5.46	2.56	47	38.8	0.54	0.56	1.78	6.24	7	129	0	0	0	0	0	0	0	0	0	0	0	0	0	0	0	0	0	0	0	0	0	0	0	21	0	0
李风兰	8	非重症	女	75	160	68	否	否	否	否	否	否	否	19.02	16.58	87.2	6.2	0.11	11.03	1.08	25.8	25	130	0	0	280	0	0	0	0	30	0	0	0	0	0	0	0	0	0	6013	0	0	0	0	0	38	0	0
雷朵朵	5	非重症	女	60	160.5	58	否	否	否	是	否	否	否	3.1	1.72	55.5	35.2	0.04	15.5	0.18	1.5	11	131	0	0	0	0	0	0	0	0	3	86	39	0	0	0	0	0	0	0	0	0	0	0	0	0	0	0
梁婷	10	非重症	女	35	160	75	否	否	否	否	否	否	否	5.94	4.83	81.3	13.1	0.06	39.58	0.48	5.89	19	132	0	0	0	0	0	0	0	0	0	92	0	0	0	0	10	41626	0	0	1029	0	0	0	0	0	0	0
薛功	8	非重症	男	56	167	70	是	是	是	否	否	否	是	10.28	8.34	81.2	9.3	0.11	118.55	1.57	11.52	16	133	0	0	0	0	210	32856	0	0	0	0	11	0	0	0	0	0	0	0	0	0	0	0	0	0	0	0
卫一颖	13	非重症	女	15	153	45	否	否	否	否	否	否	否	6.49	4.6	70.8	19.9	0.21	74.23	6.5	71.46	45	134	0	0	0	0	1733	0	0	0	0	0	0	0	0	0	0	0	25986	0	0	0	0	0	0	0	0	0
席全珠	7	非重症	女	70	146.5	37.5	否	否	是	否	否	否	否	6.53	4.21	64.4	28.2	0.05	1.75	0.59	6.18	62	135	0	0	0	0	11232	0	0	0	0	246	78	0	66	0	0	0	0	0	0	0	0	0	0	0	0	0
周小胜	8	非重症	男	55	168	65	否	否	是	否	否	否	是	6.51	0.46	78.4	7.1	0.19	77.02	1.02	28.73	58	136	0	0	0	0	0	0	0	0	0	0	0	11744	0	0	0	0	22	0	0	0	0	0	0	0	0	0
张建亲	9	非重症	女	81	151	47	否	否	是	是	否	否	是	7.18	5.19	72.2	19.5	0.64	67.94	1.98	8.09	119	137	0	4135	0	0	434	0	0	0	0	2449	0	0	0	80	0	0	0	0	0	0	0	0	0	0	0	0
吴喜云	8	非重症	男	62	162.5	57.5	是	是	否	否	否	否	是	5.69	4.02	70.5	19.2	0.08	80.49	1.83	12.74	105	138	0	0	0	0	0	0	24	0	51	0	0	0	0	0	0	0	0	0	0	0	0	0	0	0	0	0
张武红	7	非重症	男	48	169	68.5	是	是	否	否	否	否	否	12.43	9.93	79.8	12.5	0.27	224	0.99	194.3	20	139	0	0	0	0	0	0	0	0	0	0	0	0	0	0	0	0	0	0	0	0	0	0	0	0	0	0
李宸旭	5	非重症	男	15	169	45.5	否	否	否	否	否	否	否	8.45	5.84	69.2	16.9	0.09	92.5	2.12	27.9	12	140	0	0	0	0	0	0	0	0	0	43	0	0	0	0	0	0	41088	0	0	0	0	0	0	0	0	0
崔平安	5	非重症	男	72	177	64	是	否	否	否	否	否	否	9.42	6.76	71.7	17.2	0.1	100.48	0.53	18.91	88	141	0	0	0	42	0	0	0	0	0	0	86	0	0	0	0	0	0	0	0	0	0	0	0	0	0	0
樊珍枝	6	非重症	女	66	150.5	73	否	否	是	否	否	否	否	4.92	3.39	68.9	19.9	0.03	3	0.46	3.04	18	142	0	2127	0	0	1511	0	0	0	0	2646	0	0	0	0	0	0	0	0	0	0	0	0	0	0	0	0
王振全	5	非重症	男	78	170	72	否	否	否	否	否	否	否	5.69	3.91	68.6	19.2	0.02	0.36	0.3	5.63	7	143	0	56	0	0	8333	0	0	0	0	111	218	0	0	0	0	0	0	0	0	0	0	0	0	0	0	0
张毅	4	非重症	男	30	170	58	是	否	否	否	否	否	否	23.11	18.59	80.4	10.9	3.32	172.05	2.5	1492	86	144	0	0	0	0	0	0	3621	27	0	0	7900	0	0	0	0	0	0	0	0	0	0	0	0	0	0	0
范康平	8	非重症	女	56	155	55	否	否	是	否	是	否	否	5.24	3.2	61	25.4	0.02	24.85	1.78	20.6	93	145	0	97	0	0	0	0	0	0	0	0	0	0	1141	0	0	0	0	0	17	0	0	81	0	0	0	0
王洪祥	6	非重症	男	75	157.5	46	否	否	是	否	否	否	否	15.17	12.99	85.6	85.6	0.66	130.58	3.67	53.41	77	146	0	0	9951	0	0	0	0	0	12	340	0	0	0	0	0	0	0	0	0	0	0	0	0	0	0	0
郭红玉	5	非重症	男	56	170	69	是	否	否	否	否	否	否	12.86	9.02	70.2	21	0.03	1.51	0.43	9.51	55	147	0	1543	0	0	0	0	0	0	10	0	0	0	472	0	1875	0	0	0	0	0	0	0	0	0	0	0
李东海	5	非重症	男	65	162	52	是	是	否	否	否	否	是	5.25	3.4	64.7	21.3	0.02	0.1	0.2	2.43		148	0	0	0	0	454	0	0	0	0	1848	0	0	0	0	0	0	0	0	0	72	0	0	0	397	0	0
张红	11	重症	男	62	176	54	是	是	否	否	是	否	否	12.75	10.22	80.3	9.6	0.08	139.24	0.96	116	67	1	0	0	0	0	0	25	4097	546	203	203	7641	0	0	0	0	0	0	0	0	0	331	0	0	0	0	0
董启民	8	重症	男	72	170	卧床	是	否	是	是	否	否	是	10.35	9.81	94.8	2.2	13.9	275.59	2.94	179.9	117	2	0	0	0	0	6123	48289	0	0	16	0	52	0	0	0	0	0	0	0	239	0	0	0	0	0	6060	64
张小梅	11	重症	男	65	170	卧床	是	否	否	否	否	否	否	9.98	7.41	74.3	17.2	0.42	224.96	5.81	208.1	121	3	0	0	0	0	1164	0	0	0	0	1766	0	0	0	0	0	48300	0	0	0	0	0	0	0	0	0	0
王巧玉	15	重症	女	64	150	50	否	否	是	否	是	否	否	16.3	15.01	92.2	4.1	25.1	271.5	1.17	4.39	45	4	0	0	12	0	0	0	0	0	0	0	0	0	0	0	0	0	0	0	0	0	0	0	0	0	0	0
郁金生	29	重症	男	74	65	104	是	是	否	否	否	否	否	6.08	5.05	83	13.5	0.24	14.99	1.95	906.9	78	5	0	0	43515	2071	0	228	0	0	0	0	19	0	0	0	0	0	0	0	0	0	37100	0	0	33	0	0
刘忠学	29	重症	男	76	170	70	是	是	是	否	是	否	是	9.23	7.22	78.2	15.1	0.9	99.59	1.1	41.23	57	6	0	0	15	0	45	31	0	0	61	0	84	0	0	0	0	0	0	0	0	41	571	0	0	1263	0	0
武新瑞	11	重症	男	78	160	55	否	否	否	否	否	否	否	7.34	6.44	87.8	5.3	0.36	70.33	1.29	48.87	90	7	0	0	177	0	18778	0	0	0	0	0	42	0	0	0	0	0	0	0	0	0	0	0	0	0	0	0
杜振声	9	重症	男	92	160	35	是	是	否	是	否	是	否	17.44	7.56	80.7	12.2	0.41	26.43	3.56	49.2	106	8	173	129	0	0	118	19044	0	0	0	0	0	0	0	0	0	0	0	0	0	0	30320	0	0	3761	0	0
郝有新	23	重症	男	86	169	73	是	是	否	否	否	否	否	8.82	7.91	89.8	0.78	18.2	201.68	3.87	18.2	60	9	2430	0	7556	0	0	0	0	0	0	0	18	0	0	0	0	0	0	0	0	0	45146	0	0	0	0	0
翟月英	10	重症	女	84	158	45	否	否	是	是	否	否	否	25.49	23.88	93.7	1.4	0.23	98.89	9.27	27.85	29	10	0	0	0	0	35145	20	0	0	452	0	2663	0	0	0	0	4249	0	0	0	1548	0	0	38	0	0	0
张成业	31	重症	男	67	167.5	76.5	是	否	否	是	否	否	否	4.94	3.93	79.8	11.2	0.04	35.04	0.89	15.2	56	11	0	0	0	8294	0	240	7896	0	451	0	0	0	0	0	36	0	0	0	0	0	63301	0	0	0	0	0
李宏微	17	重症	女	57	160	43.5	否	否	否	否	否	否	否	8.16	6.22	76.3	14.6	0.97	139.95	1.48	1530	27	12	0	0	225	0	0	0	266	0	209	71	677	0	0	0	212	0	0	0	0	0	0	0	0	0	4	0
扈吉祥	12	重症	男	86	180	55	否	否	是	是	是	否	否	13.35	12.27	91.9	5.2	2.1	188.05	1.96	254.6	96	13	0	0	509	5135	12152	40160	0	0	0	0	102	0	1289	0	0	0	0	0	0	0	68	0	0	6920	0	0
谭徐堂	31	重症	男	79	170	75	是	否	否	否	否	否	否	12.25	11.34	92.5	4.1	0.06	10	1.8	11.5	80	14	0	0	0	36	55	717	0	0	0	0	55	0	0	0	0	0	0	0	0	0	104	0	0	93	0	0
高新根	11	重症	男	63	170	卧床	否	否	否	否	否	否	否	10.71	9.28	86.6	6.3	0.44	17.94	1.96	25.35	52	15	0	0	221	4222	144	123	0	0	0	0	19	11	0	0	0	0	0	0	0	0	45687	0	0	0	0	0
杨士祥	25	重症	男	84	174	60	是	否	否	否	否	否	否	15.74	13.68	86.9	5.1	0.13	9.26	8.83	135.8	28	16	0	0	18228	0	852	0	0	0	1161	791	16270	0	0	0	0	0	0	0	0	0	0	0	0	0	0	0
李树仁	7	重症	男	79	168	卧床	是	否	否	是	是	否	否	10.37	9.03	87.1	7.8	0.2	83.87	1.01	74.39	89	17	0	0	0	3702	8306	0	0	0	0	0	426	0	0	0	0	0	0	0	758	0	51184	29	0	0	0	0
赵根生	14	重症	男	78	170	70	是	是	是	否	是	否	是	6.75	5.55	82.4	12.7	1.44	148.15	5.55	341.6	21	18	3938	0	1004	0	330	24053	0	0	0	0	30	0	1511	0	0	0	0	0	0	0	0	0	0	11785	0	0
赵和平	14	重症	男	74	178	75	否	否	是	是	否	否	否	13.44	12.2	90.8	1	1.39	75.06	1.2	39.04	89	19	0	0	53	0	9563	0	955	0	0	5617	0	0	566	0	0	0	0	0	0	0	24768	0	0	0	0	0
李恭己	9	重症	男	85	173	55	否	否	是	是	否	否	否	8.27	7.36	89	5.1	0.4	207.66	46.22	87.8	96	20	0	0	123	1470	4029	20341	0	0	0	345	0	0	154	0	0	0	0	0	0	0	0	0	0	0	0	0
严邦云	5	重症	女	66	153.5	58.8	否	否	是	否	是	是	否	10.54	8.93	84.3	13.3	0.32	98.3	0.61	65.2	109	21	0	0	4621	0	11949	0	6567	0	578	0	5	0	0	0	0	0	0	0	0	0	260	0	0	0	0	0
陈合香	10	重症	女	80	148	46	否	否	否	否	否	否	否	11.99	10.33	86.1	7.7	0.1	102.25	1.59	84.94	55	22	0	1413	233	0	1119	0	0	0	20	0	3	0	0	0	0	0	0	0	0	0	0	0	0	101	0	0
潘转窝	11	重症	男	79	166	71	否	否	是	否	是	是	否	18.75	16.71	89.1	4.6	0.28	121.4	5.5	182.1	31	23	0	106	1198	0	0	0	0	0	0	0	0	0	0	0	5430	0	0	0	0	0	0	0	0	0	0	0
王开昌	7	重症	男	75	167	53	是	是	是	否	是	否	否	8.53	7.25	85	6.7	0.18	174.95	4.04	647.2	67	24	0	0	2069	0	0	0	0	0	0	114	26	0	137	0	0	0	0	0	0	0	0	0	0	0	0	0
吴肖鹏	11	重症	男	37	175	65	是	是	否	否	否	否	是	8.91	7.66	86	7.6	0.46	128.57	4.36	334.9	95	25	0	0	0	0	0	0	0	0	4	0	0	0	0	0	50	0	0	0	0	0	0	0	0	0	0	0
李广义	7	重症	男	76	165	45	否	否	是	否	否	否	否	5.69	4.96	87.1	8.6	4.36	117.92	1.9	246.2	39	26	487	0	0	406	0	91	0	0	0	0	0	0	0	0	0	0	0	0	424	0	0	210	0	0	0	0
张士秀	8	重症	男	90	150	49	是	否	否	否	是	否	否	9.43	8.69	92.1	2.9	7.69	53.27	12.97	23.21	61	27	0	0	0	11027	9418	0	0	0	0	0	3272	0	0	0	0	0	0	0	0	1111	0	0	0	0	0	0
景红霞	8	重症	女	79	160	54	否	否	否	否	否	否	否	14.34	13.24	92.4	4	0.24	79.25	6.4	51.91	92	28	0	0	2457	443	12768	38	0	0	0	0	200	0	0	0	0	0	0	0	0	4488	376	0	0	0	0	0
王通情	16	重症	女	76	156	卧床	否	否	否	否	否	否	否	25.37	23.41	92.2	4.1	0.17	51.29	2.33	12.27	83	29	15	0	0	0	23258	0	0	0	8	0	0	0	0	0	0	0	0	0	0	2816	125	0	0	0	0	0
吕艳国	17	重症	男	41	165	55	否	否	否	否	否	否	是	17.22	15.74	91.5	4.6	8.73	233.7	6.05	39.99	53	30	0	0	0	0	0	0	0	0	0	252	351	0	0	0	0	0	0	0	19994	0	0	10296	0	0	0	0
邓占宽	10	重症	男	84	168	50	是	否	是	否	是	否	否	7.53	6.7	89	8.1	9.67	118.91	8.49	4508	41	31	0	0	115	0	17177	612	0	0	0	0	0	0	0	0	0	0	0	0	0	0	35568	0	0	0	0	0
武喜禄	15	重症	男	64	175	72.5	否	否	否	否	否	否	否	14.24	12.57	88.3	3.9	0.61	81.82	0.61	59.7	25	32	0	0	35	0	0	30168	0	0	0	0	0	0	0	0	0	0	0	0	0	0	0	0	0	0	0	0
孟仲恭	10	重症	男	60	175	90	是	是	是	否	否	否	否	11.5	9.57	83.2	8.3	0.34	181.58	0.79	670	109	33	0	314	0	0	44206	0	0	0	0	29	23	0	0	0	202	0	0	0	0	0	0	0	0	0	0	0
杨王太	9	重症	男	64	175	卧床	是	是	否	否	否	否	否	7.51	6.85	91.2	4	10.71	19.72	2.56	4010	41	34	0	0	0	0	363	19996	0	0	0	96	65	0	68	0	0	0	0	0	0	0	0	0	0	0	0	0
胡国省	3	重症	男	65	172	62	否	否	否	否	否	否	否	6.8	5.71	84	13.4	0.39	211.46	1.61	1961	67	35	0	0	10366	0	0	0	19116	0	2341	0	11	23537	0	0	0	0	0	196	0	0	0	0	0	0	0	0
赵天明	5	重症	男	67	178	55	否	否	否	是	否	否	是	9.81	9.39	95.7	2.8	6.84	243.32	2.38	519.6	65	36	15626	0	26629	0	58	0	153	0	0	0	1856	0	0	0	0	0	0	0	0	0	8239	0	0	0	0	0
薛金堂	8	重症	男	83	175	60	否	否	是	是	否	否	否	4.08	2.77	68	20.3	3.61	45.88	0.77	7.5	98	37	0	0	0	13225	40086	0	25	0	0	0	59	0	0	0	0	0	0	0	0	0	0	0	0	0	0	0
付明义	12	重症	男	39	161	41	否	否	否	否	否	否	是	9.31	6.64	71.3	17.2	0.09	17.78	1.62	251.7	24	38	0	0	8	0	0	0	0	0	0	0	0	0	257	0	0	0	0	0	10007	0	0	1920	0	0	4	0
尹奇峰	14	重症	男	51	170	85	是	否	否	否	否	是	是	32.35	27.65	85.5	6	3.07	408.97	2.08	1083	80	39	0	0	0	0	0	0	0	0	0	0	0	0	132	0	0	0	0	0	0	0	0	0	0	0	0	0
王俊刚	9	重症	男	60	185	75	是	是	否	否	是	否	否	18.65	16.47	88.3	5.1	0.26	76.79	2.95	84.91	24	40	0	0	0	0	28947	0	0	6	0	0	261	0	0	0	0	0	0	0	6350	0	0	0	0	0	0	0
杨生华	10	重症	男	88	168	80	否	否	是	是	否	否	是	5.87	5.47	93.2	4.3	0.69	283.09	12.37	56.8	33	41	0	0	9	0	0	24	21856	0	0	0	0	0	0	0	0	0	0	0	0	0	0	0	0	0	0	0
刘婷	3	重症	女	38	173	56.5	否	否	否	否	否	否	否	18.66	14.8	79.3	13	0.51	123.99	9.62	101.1	66	42	0	0	9	0	31735	0	0	0	0	215	0	0	0	0	0	0	0	0	0	0	0	0	0	0	0	0
陈继忠	7	重症	男	83	178	49	是	否	否	否	否	否	否	12.05	11.17	92.6	2.6	1.14	156.21	7.38	870.5	100	43	0	0	0	4719	0	659	0	0	0	0	465	0	0	0	0	0	0	0	0	0	26729	0	0	0	0	0
梁兆英	18	重症	女	84	卧床	卧床	否	否	是	是	否	否	是	5.24	4.19	80	14.3	0.05	110.58	0.4	175.4	89	44	0	0	14	170	19	0	0	0	0	0	0	0	0	0	0	0	0	0	0	0	16129	0	0	0	0	0
王馨媛	5	非重症	女	17	166	57	否	否	否	否	否	否	否	15.89	12.14	76.5	15.6	0.02	14.04	0.7	14.5		149	0	0	0	0	6850	0	0	0	0	138	0	0	0	0	0	0	28290	0	0	0	0	0	0	0	0	0
赵云	17	重症	男	57	167	67.5	否	是	是	否	否	否	否	18.73	16.34	87.2	5.8	0.69	82.22	1.08	46.5		150	0	0	0	0	0	182	0	0	0	0	0	0	0	0	695	0	0	0	0	0	0	0	125	1071	0	0
樊增耀	4	非重症	男	65	165.5	53.5	是	否	否	是	否	否	否	4.67	3.14	67.2	24.4	0.02	1.09	0.83	7.3	26	151	0	0	0	0	2396	0	0	0	0	0	0	0	0	0	0	0	0	0	0	0	0	0	15	366	0	0
赵鹏	8	非重症	女	47	159	61.5	否	是	否	否	否	否	否	5.81	2.62	45.1	46.6	0.02	0.34	0.19	1.5	9	152	347	0	0	0	0	0	0	22	0	0	0	0	0	0	0	0	0	0	0	0	0	0	0	0	0	0
王有东	6	非重症	男	62	170	55	是	是	否	否	否	否	否	8.67	6.36	73.4	12.5	0.09	112.19	2.19	65	114	153	0	0	0	0	25543	0	0	0	0	246	2925	0	0	0	0	0	0	0	0	0	0	0	0	365	0	0
裴存财	14	非重症	男	63	171	65	是	否	否	否	否	否	否	6.84	4.19	61.4	27	0.05	58.1	0.32	14.92	27	154	0	0	0	0	0	0	0	0	0	0	15	0	0	0	1232	0	0	0	0	0	0	0	0	0	0	0
梁万贵	4	重症	男	74	168	55	是	否	是	是	否	否	否	9.62	7.85	81.6	13.7	11.12	289.42	73.52	＞5000	22.1	155	0	1366	199	0	3250	0	0	0	0	0	0	0	724	0	0	0	0	0	0	0	0	0	0	0	0	0
刘应选	8	非重症	男	77	172	55	否	否	否	否	否	是	否	9.59	7.82	81.5	8.7	0.05	11.01	1.35	16.81	41	156	0	0	0	0	21980	0	0	0	0	2704	988	0	0	0	0	0	0	0	0	0	0	0	0	302	0	0
卢学良	8	非重症	男	59	160	42	否	否	否	否	否	是	否	12.81	10.25	80	14.7	0.11	143.14	1.52	160.5	105	157	0	0	0	0	12313	0	0	0	0	0	0	0	0	0	0	0	0	0	0	0	0	0	0	0	0	0
刘云峰	7	非重症	男	61	179	67	是	否	否	否	否	否	否	3.94	1.91	48.5	38.3	0.11	241	0.52	37.3	89	158	0	0	0	0	2706	0	0	0	0	0	12	0	0	0	0	0	0	0	0	0	0	0	0	0	0	0
李立春	7	非重症	男	76	174.5	55	是	否	否	否	否	否	否	16.48	13.3	80.7	10.9	0.17	86.39	3.8	58.51	56	159	0	0	0	0	0	0	0	0	89	0	97	0	0	0	0	0	0	0	0	0	0	0	0	0	0	0
王志清	17	非重症	男	72	167	55	是	是	是	否	否	否	否	20.13	18.26	90.7	2.5	0.39	94.78	23.5	30.44		160	0	0	14	0	32	0	0	0	0	0	0	0	0	0	0	0	0	0	0	0	0	0	0	0	0	0
李占元	9	重症	男	98	168	卧床	否	否	否	是	否	否	否	1.09	0.91	83.4	13.8	＞100	91.84	4.89	558.3		161	0	0	0	0	0	0	0	0	0	0	0	0	0	0	0	0	0	0	0	0	0	0	650	0	0	0
党政军	10	重症	男	76	178	71	否	否	否	否	否	否	否	13.2	12.65	95.9	2.4	0.19	127.89	0.67	48.57	49	162	0	0	18153	0	0	0	0	0	0	0	5360	0	0	0	0	0	0	0	0	0	0	0	0	0	0	0
吕建国	5	非重症	男	79	158	41	是	否	否	否	否	否	否	6.27	5.08	81	13.4	0.55	48.95	1.3	6.39	80	163	0	0	0	0	22509	0	0	0	0	0	10	0	0	0	0	0	0	0	0	0	0	0	0	0	0	0
赵雪欣	8	非重症	男	87	170	65	否	否	否	否	是	否	否	3.99	3.38	84.7	9	0.39	178.17	0.88	145.1		164	0	0	2265	0	30777	0	0	0	0	0	0	0	0	0	0	0	0	0	0	0	0	0	0	0	0	0
贾萌	4	非重症	女	36	158	52	否	否	否	否	否	否	否	4.93	3.15	63.9	24.1	0.04	24.49	0.26	21.04	42	165	0	0	0	0	0	0	0	0	559	0	0	0	0	0	0	0	0	0	0	0	0	0	0	0	0	0
郑迎昌	5	非重症	男	63	166	63	否	否	否	否	否	否	否	6.56	4.54	69.3	24.5	0.04	0.77	0.22	3.6		166	0	0	0	0	0	0	0	0	0	34	0	0	0	0	0	0	0	0	0	0	0	0	0	0	0	0
刘引保	2	非重症	男	67	160	70	否	否	是	是	否	否	是	8.3	4.46	53.8	30.1	0.05	0.92	0.28	3.21		167	0	0	0	0	0	0	0	0	0	0	397	0	31	0	0	0	0	0	0	0	0	0	0	0	0	0
姚允卜	8	重症	男	69	175	68	否	否	是	否	否	否	否	19.22	15.43	80.3	12.3	3.9	143.48	1.32	95.35	35	168	12	0	26	0	0	0	0	0	0	0	0	0	0	0	0	0	0	0	0	0	0	0	0	0	0	0
柴芙蓉	4	重症	女	87	卧床	67	否	否	是	否	否	否	否	13.67	11.73	85.8	7.9	0.43	228.43	4.2	1286	86	169	0	0	0	0	0	0	0	0	0	0	0	0	0	0	0	0	0	0	0	0	0	0	0	0	0	0
王庭秀	10	非重症	男	88	160	51	否	否	是	是	否	否	是	12.48	11.71	93.8	3.3	0.32	139.32	7.67	163.4		170	0	0	0	26228	0	0	0	0	0	0	2004	0	0	0	0	0	0	0	0	0	0	0	0	0	0	0
芦双星	15	重症	男	78	170	卧床	否	否	否	否	否	否	否	13.54	11.7	86.4	6.1	0.07	42.82	4.91	354	37	171	6	0	29	0	611	0	0	0	0	0	0	0	0	0	0	0	0	0	0	0	0	0	0	0	0	0
薛春明	17	重症	男	89	175	卧床	否	否	是	否	否	否	否	9.83	7.42	75.5	15.6	0.11	64.83	1.35	38.46	47	172	0	0	0	0	0	0	13	0	0	0	0	0	0	0	0	0	0	0	0	1242	0	0	0	0	0	0
景仁义	4	重症	男	82	180	卧床	否	否	否	否	否	否	否	12.08	10.2	84.4	5.8	＞100	198.59	13.5	466.9	31	173	0	0	0	0	0	0	0	0	0	0	0	0	0	0	0	0	0	0	0	0	0	0	0	0	0	0
费建功	8	非重症	男	58	167	73	是	是	否	否	是	否	否	15.11	13.2	87.4	7.7	0.22	43.2	0.76	52.1	102	174	0	0	0	0	0	0	0	0	0	78	0	0	393	0	0	0	0	0	0	0	0	0	0	0	0	0
王森	5	非重症	男	35	174.5	50	否	否	否	否	否	否	否	5.69	3.6	63.3	27.6	0.09	28.41	0.2	12.75	58	175	0	0	4	0	0	40	0	0	0	0	0	0	0	0	0	0	0	0	0	0	0	0	0	0	0	0
廉蜜	5	非重症	女	81	152.5	57	否	否	是	否	否	否	否	8.4	6.2	73.8	15.5	0.06	44.69	0.81	26.07		176	0	0	0	0	442	0	0	0	0	32	0	0	70	0	0	0	0	0	0	0	0	0	0	0	0	0
曹孔雀	7	非重症	女	69	156.5	67	否	否	否	否	否	否	否	3.31	2.67	80.7	17.8	0.04	1.76	0.52	1.5	37	177	0	0	0	0	6245	0	172	0	0	0	21	0	0	0	0	0	0	0	0	0	0	0	0	0	0	0
罗候平	10	重症	女	53	160	70	否	否	是	否	否	否	否	19.33	18.08	93.5	4	0.88	6.75	1.37	130.3	7	178	0	0	0	0	0	0	0	0	0	37	0	0	43	0	0	0	0	569	0	0	0	0	0	0	0	0
王霞	7	非重症	女	52	161	70	否	否	否	否	是	否	否	4.87	2.58	53	34.5	0.09	42.36	0.3	17.7	26	179	0	0	0	0	759	0	0	0	0	64	0	0	75	0	0	0	0	0	0	0	0	0	0	0	0	0
周振兵	7	非重症	男	54	160	70.5	是	是	否	否	否	否	否	11.61	8.03	69.2	23.4	0.05	39.69	1.33	14.2	80	180	0	0	0	0	0	18	0	0	0	0	0	0	0	0	0	0	35726	0	0	0	0	0	0	0	0	0
吉振英	5	非重症	男	81	171	64.5	否	否	否	否	否	否	否	4.52	3.01	66.6	23.9	1.19	1.52	0.26	1.5	7	181	0	0	0	7971	0	0	0	0	0	0	0	0	0	0	0	0	0	0	0	0	0	0	0	0	0	0
柴梦财	13	重症	男	71	170	60	否	否	是	否	是	否	否	24.3	21.21	87.2	6.9	1.51	107.74	4.82	48.29		182	0	0	0	0	0	0	0	0	0	54	0	0	0	0	0	0	0	0	0	0	0	0	0	0	0	0
谢革娃	8	非重症	男	54	180	78	否	否	否	否	否	否	是	9.19	7.14	77.7	15.7	1.14	29.79	0.31	8.97		183	0	625	0	0	0	0	0	0	12	0	5	0	0	0	0	0	0	0	0	0	0	0	0	0	0	0
杨香草	7	非重症	女	56	151	57.5	否	否	否	否	否	否	否	10.92	9.17	84	10.6	0.07	118.56	0.64	46.74	88	184	0	0	0	0	13218	0	0	0	0	324	0	0	0	0	0	0	0	0	0	0	0	0	0	0	0	0
王志峰	3	非重症	男	42	168	78	否	是	否	否	否	否	否	9.48	7	74	14	0.16	62.56	2.03	24.81	68	185	0	0	112	0	0	0	0	0	0	67	0	0	0	0	0	0	24375	0	0	0	0	0	0	0	0	0
曹雅妮	3	非重症	女	25	169	58	否	否	否	否	否	是	否	7.57	5.73	75.6	17.6	0.02	12.78	2.14	5.16	41	186	0	0	0	0	0	0	0	0	0	0	0	0	0	0	279	0	0	0	0	0	0	0	0	0	0	0
辛仰民	7	非重症	男	63	175	77	否	否	否	是	否	否	否	6.51	5.11	78.4	11.4	0.35	115.84	0.68	22.56	49	187	0	0	0	0	0	0	0	0	0	0	245	0	0	0	0	0	0	0	0	0	0	0	0	0	12	0
任德明	17	重症	男	75	170	卧床	否	是	是	是	是	否	是	2.36	1.68	71.3	16.9	65.9	236.76	10.87	23.08		188	0	0	401	0	0	0	0	0	0	0	0	0	0	0	0	0	0	0	0	0	0	0	0	43	0	0
韩英平	9	非重症	男	61	168	63	否	否	否	否	是	否	否	13.28	11.47	85.7	7.7	0.06	52.7	0.23	32.91	36	189	0	0	0	0	0	0	0	0	0	0	0	0	0	0	0	0	0	0	0	0	0	0	23	0	0	0
牛彦科	5	非重症	女	41	160	62	否	否	否	否	否	否	否	5.07	1.98	39	48.1	0.04	4.02	0.46	5.66		190	0	0	0	0	0	0	0	0	0	80	0	0	0	0	0	0	0	0	0	0	0	0	0	0	0	0
展彦德	10	非重症	男	66	162	65	否	否	是	否	否	否	否	7.11	5.07	71.4	16.7	0.04	21.7	1.07	19.23	100	191	0	0	0	0	0	0	0	0	26	0	289	0	0	0	0	0	0	0	6766	0	0	0	0	0	0	0
贾根秀	9	非重症	女	56	165	卧床	否	否	是	否	否	否	是	10.96	9.93	90.6	4.8	0.31	31.58	3.49	21.48	72	192	0	0	0	0	9222	0	0	0	0	0	0	0	0	0	0	0	0	0	701	0	0	0	0	0	0	0
牛爱云	13	重症	女	71	160	90	否	否	是	否	否	否	否	17.17	14.9	86.7	6.8	0.55	47.76	2.69	86.89		193	0	0	0	0	0	0	0	0	0	0	0	0	120	0	7	0	0	0	0	0	0	0	0	0	2	0
张秋香	13	非重症	女	79	147	60	否	否	否	否	否	否	否	19.37	14.99	77.4	13.9	2.17	117.31	0.66	79.02	94	194	0	0	0	0	28642	0	0	0	0	0	113	0	0	0	0	0	0	0	0	705	0	0	0	0	0	0
景万奎	10	非重症	男	63	165	65	是	是	是	否	否	否	否	12.88	11.12	86.4	7.8	0.15	65.14	6.66	395.6		195	0	0	0	0	10922	0	0	5	0	0	0	0	0	0	97	0	0	0	0	0	0	0	0	0	0	0
史腊梅	8	重症	女	34	158	60	否	否	否	否	否	否	否	8.1	6.9	91.1	7.1	0.04	20.63	0.29	2.07	67	196	0	0	0	0	0	0	0	0	0	0	0	0	0	0	0	0	0	0	0	0	0	0	0	0	0	0
王成刚	7	非重症	男	70	168	66.5	否	否	否	否	否	是	否	3.76	2.29	60.9	19.9	0.04	21.88	3.65	6.94	110	197	0	0	0	0	0	0	0	0	0	0	0	0	0	0	27	0	0	0	0	0	0	0	0	0	0	0
张海	5	非重症	男	39	167	77.5	是	是	否	否	否	否	否	8.56	5.16	60.3	32.1	0.03	1.25	0.45	1.5	16	198	0	0	0	0	0	0	0	0	0	0	122	0	0	0	0	0	0	0	0	0	0	0	0	0	0	0
梁玲玉	7	非重症	女	69	155	61.5	否	否	否	否	否	否	否	12.54	10.89	86.7	7.7	0.1	28.46	14.09	34.51		199	0	0	0	0	0	0	0	0	0	0	27	0	0	0	155	0	0	0	0	11	0	0	0	0	0	0
成玉珊	4	非重症	女	17	160	48	否	否	否	否	否	否	否	9.82	7.55	76.9	14.7	0.09	91.99	4.42	27.08	90	200	0	0	0	0	0	0	0	0	0	0	16	0	0	0	0	0	47357	0	0	0	0	0	0	0	0	0
方高众	8	重症	男	85	卧床	卧床	是	否	否	否	否	否	否	5.84	4.98	85.3	11.8	3.57	141.52	6.53	130.1	92	201	0	0	352	0	0	0	0	0	0	0	0	0	0	0	5166	0	0	0	0	0	0	0	0	0	0	0
黄振杰	6	非重症	男	62	179	99	是	是	是	否	否	否	是	5.99	3.78	63.2	21	0.17	36.18	0.38	5.33	28	202	0	0	0	0	9743	0	0	0	0	0	44	0	0	0	79	0	0	0	0	0	0	0	0	0	0	0
樊腾	5	非重症	男	30	180	67.5	是	否	否	否	否	否	否	3.09	2.1	67.9	22.7	0.03	12.55	0.23	12.5		203	0	0	0	0	0	0	0	0	0	0	1847	0	0	0	156	0	0	0	0	0	0	0	0	0	0	0
张胜民	7	非重症	男	70	162	57	是	否	是	否	否	否	否	11.37	9.89	87	8.7	0.03	35.22	2.64	3.21	86	204	0	0	0	0	0	136	0	0	0	0	13	0	0	0	0	0	0	0	0	0	0	0	0	0	0	0
李小龙	7	非重症	男	36	169	48	否	否	否	否	否	否	否	4.42	2.52	57	31.7	0.05	26.87	0.36	7.18		205	0	0	0	0	0	22	0	0	0	36	20	0	0	0	0	0	0	0	0	0	0	0	0	0	0	0
朱稳端	7	非重症	男	68	168	60	是	否	否	否	否	否	否	11.14	7.64	68.5	20.3	0.05	83.52	0.58	28.75	120	206	0	0	0	0	256	0	0	0	0	8881	41	0	0	0	0	0	0	0	0	0	0	0	0	0	0	0
郝文成	4	非重症	男	71	170	卧床	是	否	是	是	否	否	否	6.7	3.42	51.2	30.4	0.06	2.91	0.88	54.89	31	207	0	0	0	0	902	0	0	0	0	0	0	0	261	0	3412	0	0	0	0	0	0	0	0	0	0	0
高晋平	11	非重症	男	62	170	75	是	是	是	否	否	否	否	15.01	12.89	85.9	9.5	0.97	305.01	1.95	163.3	84	208	0	166	0	0	0	0	79	0	0	0	0	0	0	0	0	0	0	0	0	0	0	0	0	0	0	0
段根富	4	非重症	男	63	165	60	否	否	否	否	否	否	否	9.94	7.57	76.2	16.6	0.04	27.81	1.13	23.14		209	0	394	0	0	0	0	0	0	0	0	0	0	868	0	0	0	0	0	0	0	0	0	0	0	0	0
程建中	13	非重症	男	70	卧床	卧床	是	是	是	是	否	否	否	8.42	6.46	76.7	14.7	0.13	33.11	1.01	1.35		210	0	0	0	0	37921	0	2598	0	239	0	0	0	0	0	0	0	0	0	0	0	0	0	0	0	0	0
王英兰	9	非重症	女	70	153.5	61	否	否	否	否	否	否	否	7.86	4.27	54.3	35.2	0.04	23.46	0.44	14.9		211	0	0	0	0	0	0	0	0	0	0	45	0	0	0	0	0	16989	0	0	0	0	0	0	0	0	0
马永康	6	非重症	女	56	157	55.5	是	否	否	否	否	否	否	5.59	3.31	59.3	25.2	0.04	30.46	0.85	10.8		212	0	0	0	0	0	0	0	0	0	713	0	0	2762	0	11998	0	0	0	0	0	0	0	0	0	0	0
周安民	7	非重症	男	74	175.5	73.5	否	否	否	否	是	否	否	7.62	5.02	65.9	23.6	0.05	30.81	0.82	7.07	31	213	0	0	0	0	1268	0	0	0	0	0	0	0	0	0	0	0	0	0	0	154	0	0	0	0	0	0
邓鑫涛	4	重症	男	31	175	91	是	是	是	否	否	否	否	5.93	4.23	71.3	21.2	0.13	95.8	1.65	13.56	69	214	0	0	0	0	0	0	0	0	0	0	0	0	171	0	0	0	36143	0	0	0	0	0	0	0	0	0
李济昌	8	重症	男	81	170	54	是	否	是	否	否	否	否	14.23	12.6	88.5	4.5	0.34	54.46	3.28	37.01		215	0	0	0	0	36792	446	0	0	0	0	138	0	0	0	0	0	0	0	0	0	0	0	0	0	0	0
李涛	11	重症	男	37	175	70	否	否	否	否	否	否	否	16.4	15.48	94.4	2	0.07	4.38	0.11	42.39		216	0	0	0	0	0	0	0	0	0	323	0	0	0	0	69	0	0	0	0	0	0	0	0	0	0	0
李民谦	7	非重症	男	61	167.5	68	否	否	是	否	否	否	否	13	9.84	75.8	12.5	0.17	146.13	6.2	29.5	73	217	0	0	0	0	0	0	0	0	88	0	22	0	0	0	0	0	0	0	0	0	0	0	0	0	0	0
曹馨丹	3	非重症	女	17	164	58	否	否	否	否	否	否	否	6.75	5.23	77.6	12	0.07	17.4	0.12	15.9	111	218	0	0	0	0	0	0	0	0	0	0	11	0	0	0	0	0	0	0	0	0	0	0	0	0	11	0
武慧欣	4	非重症	女	30	162.5	57.5	否	否	否	否	否	否	否	4.26	3.2	75.2	17.8	0.05	55.05	1.06	128.1	54	219	0	0	0	0	0	0	0	0	0	0	0	0	0	0	0	0	35210	0	0	0	0	0	0	0	0	0
周欢漪	7	非重症	女	27	168	60.5	否	否	否	否	否	否	否	4.08	2.29	56.2	30.4	0.07	19.68	0.57	13.57		220	0	0	0	0	0	0	0	0	0	0	0	0	0	0	0	0	4351	0	0	0	0	0	0	0	0	0
冯孟亲	9	非重症	女	44	166	71	否	否	是	否	否	否	否	10.47	7.06	67.4	25.1	0.03	5.31	0.73	6.43		221	0	0	0	0	117	0	0	0	0	0	0	0	0	0	0	0	0	0	0	0	0	0	0	0	0	0
孟宝虎	13	非重症	男	55	165	63	是	是	否	否	否	否	否	16.42	12.93	78.8	13.5	0.07	59.44	0.34	36.54		222	0	0	0	0	863	0	63	0	0	0	0	0	0	0	0	0	0	0	0	0	0	0	0	0	0	0
阮蕊红	8	非重症	女	55	153	44.5	否	否	否	否	否	否	否	8.64	2.68	31	30	0.02	2.4	0.18	21.2		223	0	0	0	0	0	0	0	0	0	0	0	0	0	0	0	0	0	0	0	0	0	0	0	0	0	0
王琪	7	非重症	女	32	167	64.5	否	否	否	否	否	否	否	5.7	3.62	63.5	25.6	0.07	33.86	0.38	1.53	39	224	0	0	0	0	0	0	0	0	0	0	0	0	0	0	0	0	54021	0	0	0	0	0	0	0	0	0
高双珍	11	重症	男	77	167	60	是	是	否	否	是	否	否	8.14	5.91	72.5	17	0.06	48.66	1.05	32.9	48	225	0	0	0	0	0	0	0	0	0	105	13	0	0	0	0	0	0	0	0	0	0	0	0	0	0	0
乔淑珍	9	非重症	女	77	156.5	52.5	否	否	否	否	否	否	否	7.6	4.01	52.7	20.1	0.04	40.3	0.64	6.79	68	226	0	0	0	0	0	0	0	0	0	0	760	0	0	0	0	0	0	0	0	0	0	0	0	0	0	0
姚骁凤	6	非重症	女	34	154	71.5	否	否	否	否	否	否	否	5.96	3.37	56.5	33.6	0.1	73.51	1.17	49.8	64	227	0	0	0	0	0	0	0	0	0	0	0	0	0	0	0	0	29572	0	0	0	0	0	0	0	0	0
刘艳玲	6	非重症	女	55	162.5	57	否	否	否	否	否	否	否	6.6	4.82	72.9	20.5	0.02	1.16	0.16	7.62		228	0	0	0	0	0	0	0	0	0	0	0	0	0	0	56205	0	0	0	0	0	0	0	0	444	0	0
赵云生	7	重症	男	79	160	60	是	否	否	是	是	否	否	7.4	5.11	69	20.7	0.05	56.88	6.86	47.9		229	0	0	0	0	0	0	0	0	0	0	60	0	0	0	0	0	0	0	0	0	22612	0	0	0	0	0
高世贤	9	非重症	男	66	163	58	是	否	否	否	否	否	否	8.93	6.91	77.4	13.2	0.1	92.3	0.44	90.9	108	230	0	0	0	0	6480	0	0	0	0	185	0	0	0	0	0	0	0	0	0	0	0	0	0	0	0	0
马晓红	4	非重症	女	42	165.5	61.5	否	否	否	否	否	否	否	7.23	4.73	65.5	26.4	0.02	1.35	0.2	3.47	8	231	0	0	0	0	0	0	0	0	0	0	0	0	0	0	0	0	0	0	0	0	75	0	0	0	0	0
兰德见	5	非重症	男	70	167	59	否	否	否	否	否	否	是	5.32	3.9	73.3	16.7	0.06	41.11	2.27	15.51		232	0	0	0	0	0	0	0	0	0	0	0	0	0	0	0	30087	0	0	0	0	0	0	0	0	0	0
陈亚珍	10	重症	女	50	150	50	否	否	是	否	否	否	否	5.42	4.71	86.9	7.4	0.71	197.43	3.62	7.27		233	0	0	0	0	0	0	0	0	0	0	0	0	0	0	0	0	0	0	0	0	0	0	0	0	0	0
王晓飞	5	非重症	男	35	168	50	是	是	否	否	否	否	否	6.42	4.79	74.6	14	0.11	179.96	0.62	55.3	74	234	0	0	0	0	0	0	0	0	0	0	0	0	0	0	0	0	24452	0	0	0	0	0	0	0	0	0
杨文叶	4	重症	女	76	165	65	否	否	否	否	否	否	否	8.89	7.38	83.1	13	3.94	228.12	5.37	139.2	106	235	0	0	0	0	0	54343	0	0	0	0	0	0	0	0	0	0	0	0	0	0	0	0	0	0	0	0
杜晓艳	7	非重症	女	31	160	50	否	否	否	否	否	否	否	7.46	3.7	61.2	21.3	0.6	123.36	1.83	7.81	60	236	0	0	0	0	0	0	0	0	0	0	0	0	0	0	0	0	27883	0	0	0	0	0	0	0	0	0
赵胜利	9	非重症	男	65	169	55	否	否	否	否	否	否	否	6.48	3.9	60.1	30.1	0.02	0.29	0.36	2	63	237	0	0	0	0	242	292	0	0	0	0	0	0	0	0	0	0	0	0	0	0	0	0	0	0	0	0
单爱枝	7	非重症	女	78	154	44	否	否	是	否	是	否	否	7.97	6.21	77.8	15.6	0.02	1.05	0.36	4.38	24	238	0	0	0	0	0	0	0	0	0	0	0	0	0	0	0	0	0	0	0	0	0	0	0	4690	0	0
王桃花	9	非重症	女	76	154.5	57	否	否	是	否	否	否	否	5.74	3.98	69.4	18.8	0.06	72.35	0.48	14.69	102	239	0	0	0	0	13796	0	15	0	0	0	0	0	0	0	0	0	0	0	0	0	0	0	0	0	0	0
曹冰	12	非重症	男	37	173	81	否	否	否	否	否	否	否	6.03	3.54	58.7	30.8	0.03	5.76	0.18	2.81	26	240	0	56	0	0	0	0	0	0	0	0	0	0	110	0	0	0	0	0	0	0	0	0	0	0	0	0
介宇彤	11	非重症	女	19	163.5	43	否	否	否	否	否	否	否	6.63	4.61	69.4	18.6	0.04	15.74	0.68	17.6	22	241	0	0	0	0	0	0	0	0	0	0	0	0	0	0	0	0	45932	0	0	0	0	0	0	0	0	0
程秀娥	5	非重症	女	78	153	52	否	否	否	否	否	否	否	6.23	4.86	78	14.1	0.03	70.52	8.48	25.6	80	242	0	0	0	0	0	0	0	0	0	0	0	0	0	0	0	0	0	0	0	0	0	0	0	122	0	0
乔彩变	5	非重症	女	58	159	52	否	否	否	否	否	否	否	9.51	6.11	64.3	27.5	0.07	1.08	0.68	3.39		243	0	0	0	0	0	0	0	0	0	0	0	0	0	0	35133	0	0	0	0	0	0	0	0	278	0	0
卫姣姣	4	非重症	女	41	165	56.5	否	否	否	否	否	否	否	7.7	5.07	65.8	26.5	0.02	14.9	0.72	4.02		244	0	0	0	0	0	0	0	0	0	0	0	0	0	0	0	0	24318	0	0	0	0	0	0	0	0	0
孙皓圆	7	非重症	女	18	167	98	否	否	否	否	否	否	否	8.68	6.48	74.7	17.6	0.09	80.51	0.86	35.54		245	0	0	0	0	0	0	0	0	0	0	0	0	0	0	0	0	41270	0	0	0	0	0	0	0	0	0
杨改叶	5	非重症	女	66	161	64	否	否	否	否	否	否	否	4.34	2.89	66.6	22.8	0.34	13.84	0.31	66.35	23	246	0	0	0	0	0	0	0	0	0	0	0	0	0	0	0	0	0	0	0	0	0	0	0	0	0	0
任当红	10	重症	女	76	140	40	否	否	是	是	是	否	否	5.44	3.34	61.3	27.8	0.08	42.32	0.87	211.48		247	0	0	0	0	33937	0	0	0	0	0	150	0	0	0	0	0	0	0	0	0	0	0	0	0	0	0
张轶涵	5	非重症	男	18	172	58	否	否	否	否	否	否	否	7.46	5.07	68	13.8	0.17	39.77	0.57	37.91		248	0	0	0	0	0	0	0	0	0	0	0	0	0	0	0	0	45872	0	0	0	0	0	0	0	0	0
杨文勇	15	非重症	男	46	170	68	是	是	否	否	否	否	是	13.74	12	87.3	7.4	0.12	155.81	7.71	19.97	89	249	0	0	0	0	0	0	0	0	0	0	0	0	0	0	0	0	239	0	0	0	0	0	0	0	0	0
姚金平	8	非重症	男	53	170.5	59	是	是	否	否	否	否	否	3.18	1.28	40.3	45	0.08	6.92	0.42	8.59	21	250	0	0	0	0	0	0	0	0	0	0	42	0	0	0	0	0	0	0	0	0	0	0	0	0	0	0
祁彦仁	6	非重症	男	69	167	64	是	否	是	是	否	否	否	4.43	2.78	62.7	23.7	0.07	11.71	0.27	6.63	62	251	0	0	0	0	0	0	0	0	0	0	15	0	0	0	0	0	0	0	0	0	0	0	0	0	0	0
王引吉	10	非重症	男	53	168	65	是	是	否	否	否	否	否	7.49	6.27	83.8	10.1	0.09	23.55	0.41	15.6		252	0	0	0	0	569	0	0	0	0	0	0	0	0	0	0	0	0	0	0	0	0	0	0	0	0	0
杜晓明	6	非重症	男	37	165	59	是	是	否	否	否	否	是	12.27	9.16	74.8	15.8	0.04	92.18	0.47	46.5		253	0	379	0	0	0	0	0	0	0	54	0	0	0	0	0	0	0	0	0	0	0	0	0	0	0	0
景光耀	14	重症	男	70	178	100	否	否	是	否	是	否	否	6.24	5.75	92.1	5.1	0.7	130.8	49.57	363.2		254	0	0	0	0	0	0	0	0	0	0	0	0	0	0	0	0	0	0	0	0	0	0	0	0	0	0
张红卫	9	非重症	男	58	167	65	是	是	是	否	否	否	否	6.37	2.51	39.3	39.9	0.04	4.74	0.37	2.16	17	255	0	0	0	0	0	0	0	0	0	0	42	0	0	0	0	0	0	0	0	0	0	0	0	0	0	0
郭盛才	4	非重症	男	57	165.5	68	是	是	是	否	是	是	否	5.2	2.88	55.4	28.5	0.03	1.61	0.13	6.25	10	256	0	0	0	0	0	0	0	0	0	19	0	0	0	0	33	0	0	0	0	0	0	0	0	0	0	0
杨涵茹	10	非重症	女	16	162	58	否	否	否	否	否	否	否	14.31	10.96	76.6	15.3	0.03	45.06	33.39	42.01		257	0	0	0	0	0	0	0	0	0	0	0	0	0	0	0	0	42802	0	0	0	0	0	0	0	0	0
李怡锦	4	非重症	女	18	122	69	否	否	否	否	否	否	否	7.71	4.86	63	25.8	0.04	14.55	0.19	6.2	28	258	0	0	0	0	0	0	0	0	0	0	0	0	0	0	0	0	42528	0	0	0	0	0	0	0	0	0
张胜娃	6	非重症	男	62	168	55	是	是	否	否	否	否	否	9.63	7.68	79.8	10.5	0.48	130.14	1.32	1.5	77	259	0	0	0	0	0	0	0	0	0	0	0	0	0	0	0	0	0	0	0	0	0	0	0	0	0	0
王银竹	4	非重症	女	68	156	61.5	否	否	否	否	否	否	否	4.8	2.33	48.6	44.4	0.03	5.43	0.37	3.66		260	0	0	0	0	0	0	0	0	0	0	21	0	0	0	0	0	0	0	0	0	0	0	0	0	0	0
李苏芹	4	非重症	女	75	162	73	否	否	是	否	否	否	否	7.14	5.85	81.9	10.8	0.02	40.86	1.52	18.8		261	0	0	0	0	0	0	0	0	0	0	1090	0	0	0	0	0	0	0	0	0	0	0	0	0	0	0
文保德	8	非重症	男	78	175	73	是	否	否	否	否	否	否	13.88	11.23	80.8	10.2	0.05	76.52	0.92	26		262	0	0	0	0	48257	0	0	0	0	0	425	0	0	0	0	0	0	0	0	0	0	0	0	0	0	0
陈建设	10	非重症	男	69	158	50.5	是	是	否	否	否	否	否	9.44	6.66	70.6	18	0.06	12.69	2.94	55.9	16	263	0	0	0	0	5266	0	0	0	0	0	0	0	0	0	0	0	0	0	0	182	0	0	0	0	0	0
李三反	5	非重症	男	65	13	54	是	是	否	否	否	否	否	6.79	4.34	63.9	23.7	0.03	66.11	0.94	2.76		264	0	0	0	0	0	0	0	0	0	0	62	0	0	0	0	0	0	0	0	0	0	0	0	2045	0	0
梁盛有	11	非重症	男	69	176.5	71	否	是	否	否	否	是	否	9.89	7.77	78.6	9.3	0.04	105.8	0.52	33.4		265	0	0	0	0	0	0	0	0	0	0	5	0	0	0	0	0	0	0	0	0	0	0	0	3259	0	0
马千太	7	非重症	男	77	164	68.5	是	否	否	否	否	否	否	6.98	5.5	78.8	6.3	0.34	108.82	1.17	78.28		266	0	0	0	0	0	56001	0	0	0	0	0	0	0	0	49	0	0	0	0	0	0	0	0	0	0	0
孔庆春	7	非重症	男	51	164	74	是	是	否	否	否	是	否	5.18	3.32	64	20.1	0.07	67.51	0.34	19.4		267	0	0	0	0	0	0	58	0	0	0	0	0	0	0	0	0	0	0	0	0	0	0	129	0	0	0
李福平	8	非重症	男	69	163	69	是	是	否	否	否	否	否	6.41	4.28	66.8	24.5	0.02	1.9	0.64	4.64		268	0	0	0	0	18127	28563	0	0	0	0	0	0	0	0	0	0	0	0	0	0	0	0	0	0	0	0
张当才	9	重症	男	64	158	43.7	是	否	否	否	否	否	否	13.86	13.32	96.2	2.5	1.6	294.77	3.47	2152		269	0	0	0	0	505	0	0	0	0	0	0	0	0	0	0	0	0	0	0	290	0	0	0	0	0	0
张亮娃	7	非重症	女	48	168	59.5	否	否	否	否	否	否	否	3.44	2.84	82.6	14.8	0.15	84.43	1.73	42.4		270	0	0	0	0	27257	0	0	0	0	0	0	0	0	64	0	0	0	0	0	0	0	0	0	0	0	0
洪卫兵	9	非重症	男	55	172	84	是	否	是	否	否	否	否	13.74	9.16	66.7	20.5	0.12	119.2	0.3	171	80	271	0	0	0	0	0	0	0	0	0	0	0	0	0	0	0	0	0	0	61	0	0	0	0	0	0	0
杨更狮	16	非重症	男	57	166	66	是	否	否	是	否	否	是	10.25	7.98	77.9	15.2	0.04	20.92	0.62	52.93	88	272	0	0	0	0	0	0	0	0	0	77	0	0	0	0	0	0	0	0	0	0	0	0	0	0	0	0
王永祥	8	非重症	男	49	170	86	否	否	否	否	是	否	否	12.81	8.75	68.4	21.5	0.04	21.16	0.18	32.59	10	273	0	0	0	0	0	0	0	0	0	0	0	0	0	0	0	0	0	0	0	0	0	0	0	64	0	0
姜欣	6	非重症	女	35	162.5	43	否	否	否	否	否	否	否	8.82	7.36	83.4	9	0.05	19.49	1.12	28.8		274	0	0	0	0	0	0	0	0	0	0	0	0	0	0	0	0	42466	0	0	0	0	0	0	0	0	0
李萌	4	非重症	女	38	162.5	60	否	否	否	否	否	否	否	5.87	2.81	47.8	38.2	0.02	6.87	0.37	1.5	21	275	0	0	0	0	0	0	0	0	0	0	0	0	0	0	0	0	0	0	0	0	0	0	0	0	0	0
柴建俊	6	非重症	男	47	172.5	65	是	否	否	否	否	否	否	9.48	6.27	66.1	22.2	0.09	34.96	2.46	15.39	80	276	0	0	0	0	0	0	0	0	0	0	0	0	0	0	0	0	0	0	0	0	0	0	0	0	3	0
吴根会	8	非重症	男	69	174.5	73	是	否	否	否	否	否	否	7.97	5.34	67	26.5	0.02	7.23	0.17	11.1	22	277	17435	0	0	0	8490	0	0	0	0	0	0	0	0	0	0	0	0	0	0	0	0	0	0	0	0	0
刘马林	7	非重症	男	65	161	55	是	否	是	否	否	否	否	4.53	3.07	67.8	24.3	0.05	6.05	1.58	1.5	31	278	0	0	0	0	22981	0	0	0	0	0	0	0	0	0	0	0	0	0	0	0	0	0	0	0	0	0
李华	9	非重症	女	54	170.5	69	否	否	否	否	否	否	否	7.28	5.39	74	17.4	0.11	91.16	13.7	46.9	120	280	0	0	0	0	1391	0	0	0	0	15	0	0	0	0	0	0	0	0	0	0	0	0	0	0	0	0
翟引存	5	非重症	女	76	152	60.5	否	否	否	否	否	是	否	8.66	6.05	69.9	20.7	0.06	7.15	0.82	14.01	25	281	0	0	0	0	0	0	0	0	0	0	0	0	0	0	0	0	0	0	911	0	0	0	0	0	0	0
邢家斌	9	非重症	男	83	卧床	卧床	否	否	否	是	否	是	否	7.56	5.17	68.4	10.8	0.13	48.36	6.05	35.26		282	0	0	24725	0	0	0	0	0	0	0	0	0	0	0	0	0	0	0	0	0	0	0	0	0	0	0
赵全元	15	重症	男	61	168	69	是	是	是	否	否	否	否	5.13	3.62	70.6	18.3	0.06	15.79	0.37	13.42	15	283	0	0	0	0	0	0	0	0	0	0	0	0	0	0	0	34161	0	0	0	0	0	0	0	0	0	0
贺军华	16	非重症	男	55	178	79	是	是	否	否	否	否	否	12.39	8.96	72.4	19.5	0.02	25.58	0.93	15.1	102	284	0	0	0	0	0	0	0	0	0	0	0	0	0	0	0	0	0	0	0	0	0	0	0	0	0	0
张学远	9	非重症	男	52	卧床	卧床	否	否	否	否	否	否	否	9	7.05	78.4	9.2	0.02	43.51	0.16	42.42		285	0	0	0	0	0	0	0	0	0	0	0	0	0	0	0	0	0	0	0	0	0	0	0	0	0	0
王志强	7	重症	男	51	162	81	是	否	是	是	是	否	是	12.91	10.61	82.2	9.1	4.07	149.53	2.82	82.93	94	286	0	0	0	0	0	0	0	0	0	0	56	0	0	0	0	0	0	0	0	0	0	0	0	0	0	0
刘降霞	7	非重症	女	46	160	61	否	否	否	否	否	是	否	8.12	6.02	74.2	17.6	0.16	218.01	5.51	25.61		287	0	0	0	0	0	0	0	0	0	0	0	0	0	0	13855	0	0	0	0	0	0	0	0	0	0	0
张新民	8	非重症	男	64	167	57	是	是	否	是	否	是	否	8.36	5.83	69.7	20.6	0.06	95.71	1.23	40.1	61	288	0	0	0	0	0	0	0	0	0	0	0	0	0	0	0	0	0	0	0	0	0	0	0	55	0	0
王学仁	7	非重症	男	73	167.5	66.5	否	否	是	是	否	否	否	11.9	10.73	90.2	5.8	2.95	186.14	0.23	22.1	82	289	0	0	0	0	0	0	0	0	0	0	0	0	0	0	0	0	0	0	0	0	0	0	0	0	0	0
刘马尾	17	非重症	男	81	169	51	否	否	否	否	否	否	否	4.12	3.17	77	10.7	0.09	105.19	11.56	58	73	290	0	0	0	0	107	0	0	0	0	0	0	0	0	0	0	0	0	0	0	0	0	0	0	0	0	0
王国栋	13	重症	男	83	172	60	是	否	是	是	否	否	否	4.53	2.81	62.1	26	0.56	119.28	0.5	86.77	58	291	0	0	0	0	0	0	0	0	0	0	0	0	0	0	0	0	0	0	0	0	0	0	0	0	0	0
景雪梅	8	非重症	女	78	155	65	否	否	是	否	是	否	否	3.79	2.72	71.8	22.7	0.08	33.55	28.24	15.27		292	0	0	0	0	521	0	0	0	0	0	0	0	0	0	0	0	0	0	0	0	0	0	0	0	0	0
王伟	7	非重症	男	34	176	73.5	是	是	否	否	否	否	否	12.7	8.99	70.8	18.8	0.04	102.13	0.29	32.36	76	293	0	0	0	0	0	19415	0	0	0	0	0	0	0	0	0	0	0	0	0	0	0	0	0	0	0	0
王文明	6	非重症	男	61	172	69	否	否	否	否	否	否	否	8.25	6.19	75	17.1	0.03	8.77	0.33	1.5		294	0	0	0	0	0	0	0	0	0	0	0	0	0	0	0	0	0	0	0	0	0	0	0	0	0	0
冯娟婷	13	非重症	女	45	161	64.5	否	否	否	否	否	否	否	3.73	2.41	64.6	16.4	0.3	156.32	2.76	81.45		295	0	0	0	0	0	0	0	0	0	0	0	0	0	0	0	0	0	0	0	0	0	0	0	0	0	0
卢国帅	5	非重症	男	35	178	89	是	是	否	否	是	否	否	6.49	4.4	67.8	22.5	0.05	21.07	1.96	12.05	34	296	0	0	0	0	0	0	0	0	0	0	0	0	0	0	0	0	0	0	0	0	0	0	0	0	0	0
王文平	6	重症	男	71	172	67.5	是	是	是	否	否	否	否	7.16	5.48	76.4	14.7	0.22	101.43	34.8	69	55	297	0	0	0	13502	0	0	0	0	0	0	0	0	0	0	0	0	0	0	0	0	0	0	0	0	0	0
潘武刚	5	重症	男	85	170	卧床	是	否	是	是	否	否	否	9.07	6.61	72.9	11.5	0.1	51.3	1.43	78	36	298	0	0	0	0	0	0	0	0	0	0	88	0	0	0	0	0	0	0	0	0	0	0	0	0	0	0
王红亮	6	非重症	男	59	163	73.5	是	否	否	否	否	否	否	8.72	6.61	75.9	16.3	0.02	11.51	0.81	11.5		299	0	0	0	0	0	0	0	0	0	0	0	0	0	0	0	0	0	0	0	0	0	0	0	0	0	0
刘小军	7	非重症	男	43	177.5	84	是	是	否	否	否	否	否	9.1	5.69	62.6	22.4	0.08	58.92	0.58	44.12	43	300	0	973	0	0	0	0	0	0	0	0	0	0	0	0	0	0	0	0	0	0	0	0	0	0	0	0
赵宗信	6	非重症	男	75	165	52	否	否	否	否	否	否	否	2.85	1.92	67.3	20	0.02	30.45	0.3	2.87	58	301	0	0	0	0	0	0	0	0	0	0	0	0	0	0	0	0	0	0	0	0	0	0	0	0	0	0
张彦青	8	非重症	男	61	165	45	是	是	否	否	否	否	否	11.72	9.53	81.2	13.1	0.32	91.21	0.35	25.29	46	302	0	0	0	0	0	0	0	0	0	0	0	0	0	0	0	0	0	0	0	0	0	0	0	0	0	0
李永峰	7	非重症	男	48	176	83.5	是	否	是	否	是	否	否	7.42	5.16	69.6	20.6	0.02	2.96	0.2	2.31	25	303	0	0	0	0	0	0	0	4	0	0	0	0	0	0	0	0	0	0	0	0	0	0	0	0	0	0
冯扣	9	非重症	女	29	158.5	54	否	否	否	否	否	否	否	4.23	2.87	67.8	22.5	0.04	15.92	0.58	13.95	25	304	0	0	0	0	0	0	0	0	0	0	0	0	0	0	0	0	0	0	0	0	0	0	0	0	0	0
赵东栋	18	重症	男	46	175	90	是	是	是	否	否	否	是	8.44	7.74	91.7	2.8	17.57	452.2	4.64	156.4	76	305	0	0	0	0	0	51044	0	0	0	0	0	0	0	0	0	0	0	0	0	0	0	0	0	0	0	0
杨平稳	7	非重症	男	69	156.5	41.5	是	是	否	否	否	是	否	6.69	3.43	51.3	37.8	0.02	1.76	0.16	13.3	31	306	0	0	0	0	0	0	0	0	0	0	0	0	0	0	0	0	0	0	0	0	0	0	0	0	0	0
姬俊发	8	非重症	男	78	169.5	72	否	否	是	否	否	否	是	8.08	6.43	79.5	11.8	0.02	37.62	1.55	19.5		307	0	0	0	0	0	0	0	0	0	216	0	0	0	0	0	0	0	0	0	0	0	0	0	0	0	0
原晓斌	6	非重症	男	31	183	90	否	否	否	否	否	否	否	8.53	5.42	63.4	24.2	0.02	10.12	0.76	4.5	30	308	0	0	0	0	0	0	0	0	0	0	0	0	0	0	0	0	0	0	0	0	0	0	0	0	0	0
张玉玲	9	非重症	女	50	161	56	否	否	否	否	否	否	否	7.21	4.71	65.3	21.9	0.02	51.66	0.8	24.82	68	309	0	0	0	0	10349	0	0	0	0	0	0	0	0	0	0	0	0	0	0	0	0	0	0	0	0	0
王穆穆	7	非重症	男	78	169.5	79.5	是	是	是	是	否	否	否	9.58	7.86	82.1	10.4	5.85	50.22	0.7	13	92	310	0	0	0	0	0	0	0	0	0	0	0	0	0	0	0	0	0	0	0	0	0	0	0	66	0	0
车乃悦	8	重症	男	55	174	78	是	是	是	否	否	否	否	4.95	3.9	78.8	14.3	0.07	60.95	1.11	97.93	13	311	0	0	0	0	0	0	0	0	0	0	0	0	0	0	0	0	0	0	0	0	0	0	0	0	0	0
张爱梅	15	重症	女	73	156	62.5	否	否	否	否	是	否	否	19.34	16.61	85.8	6.4	0.37	66.01	5.59	393.4	9	312	0	0	0	0	0	0	0	0	0	0	0	0	0	0	0	0	0	0	0	0	0	0	0	0	0	0
卫茂拴	12	非重症	男	57	167.5	50	是	否	否	否	否	否	否	8.37	5.34	63.8	11.2	0.03	8.62	1.09	7.78	31	313	0	0	0	0	0	0	31	0	0	0	0	0	0	0	0	0	0	0	0	0	0	0	0	0	0	0
薛学勤	5	非重症	男	71	169	74.5	否	否	否	否	否	否	否	4.35	2.49	57.2	28.5	0.04	2.95	0.53	7.01	9	314	0	0	0	0	0	0	0	0	0	0	101	0	0	0	0	0	0	0	0	0	0	0	0	0	0	0
刘新民	8	非重症	男	68	160	42	是	是	是	否	是	否	否	9.86	8.83	89.5	5.6	0.06	190	0.67	27.1	75	315	0	688	0	0	0	0	0	0	0	0	0	0	0	0	0	0	0	0	0	0	0	0	0	0	0	0
尚亚军	11	非重症	男	48	169.5	72.5	是	是	是	否	否	否	否	12.97	9.88	76.1	14.6	0.08	45.09	0.45	41.9	84	316	0	0	0	0	0	0	0	0	0	0	0	0	0	0	0	0	0	0	0	0	0	0	0	194	0	0
孙引芳	5	非重症	女	62	153.5	63	否	否	否	否	否	否	否	8.6	5.66	65.8	21.7	0.05	5.69	0.5	2.04	23	317	0	0	0	0	0	0	0	0	0	0	0	0	0	0	0	0	0	0	0	0	0	0	0	0	0	0
陈当娥	6	非重症	女	66	157	68	否	否	是	是	否	是	是	3.33	2.05	61.6	28.2	0.12	83.51	1.1	4.91	90	318	0	0	0	0	0	0	0	0	0	0	0	0	0	0	0	0	0	0	0	0	0	0	0	0	0	0
张芳芳	11	重症	女	71	卧床	卧床	否	否	否	否	否	否	是	3.76	2.61	69.4	23.4	0.84	69.38	2.81	57.22		319	0	0	0	0	0	0	0	0	0	0	0	0	0	0	0	0	0	0	0	0	0	0	0	0	0	0
张小鹏	6	非重症	男	34	165	63.5	是	是	否	否	否	否	否	8.43	4.99	59.3	32.7	0.04	1.58	0.23	6.9	29	320	0	0	0	0	0	0	0	0	0	0	0	0	0	0	0	0	0	0	0	0	0	0	0	0	0	0
刘小喜	23	非重症	男	74	180	90	是	否	是	否	是	否	否	26.34	25.07	95.1	1.8	2.84	299.17	0.82	17.12		321	0	0	0	0	0	0	0	0	0	0	0	0	0	0	0	0	0	0	0	0	0	0	0	0	0	0
张全学	6	非重症	男	71	165.5	69.5	是	否	否	是	否	否	否	7.54	4.36	57.9	23.7	0.04	11.02	0.54	3.81	55	322	0	0	0	0	0	0	0	0	0	0	0	0	0	0	0	0	0	0	0	0	0	0	0	0	0	0
[truncated: 101 more columns]
